# Supplementary material for: [2 + 2] Photodimerization of Naphthylvinylpyridines through Cation-π Interactions in Acidic Solution
Source: MDPI journal article supplement (doi:10.3390/molecules22030491), 2017-03-20
Supplement: s1 [file s1]

# Supplementary Materials

## **[2+2] Photodimerization of Naphthylvinylpyridines through Cation- $\pi$ Interactions in Acidic Solution**

Shinji Yamada\* and Yuka Nojiri

Department of Chemistry, Ochanomizu University, 2-1-1 Otsuka, Bunkyo-ku, Tokyo 112-8610 (Japan)

Fax: (+81) 3-5978-5349; E-mail: yamada.shinji@ocha.ac.jp

### Table of Contents

|                                                                  |        |
|------------------------------------------------------------------|--------|
| 1. $^1\text{H}$ NMR spectra for <b>2a-5a</b> and <b>2b-4b</b>    | S1-S8  |
| 2. MS spectra for <b>3a</b> , <b>4b</b> and <b>5a</b>            | S9-S11 |
| 3. Plots of second-order kinetics for the formation of <b>2a</b> | S12    |

# 1. <sup>1</sup>H NMR spectra for 2a-5a and 2b-4b

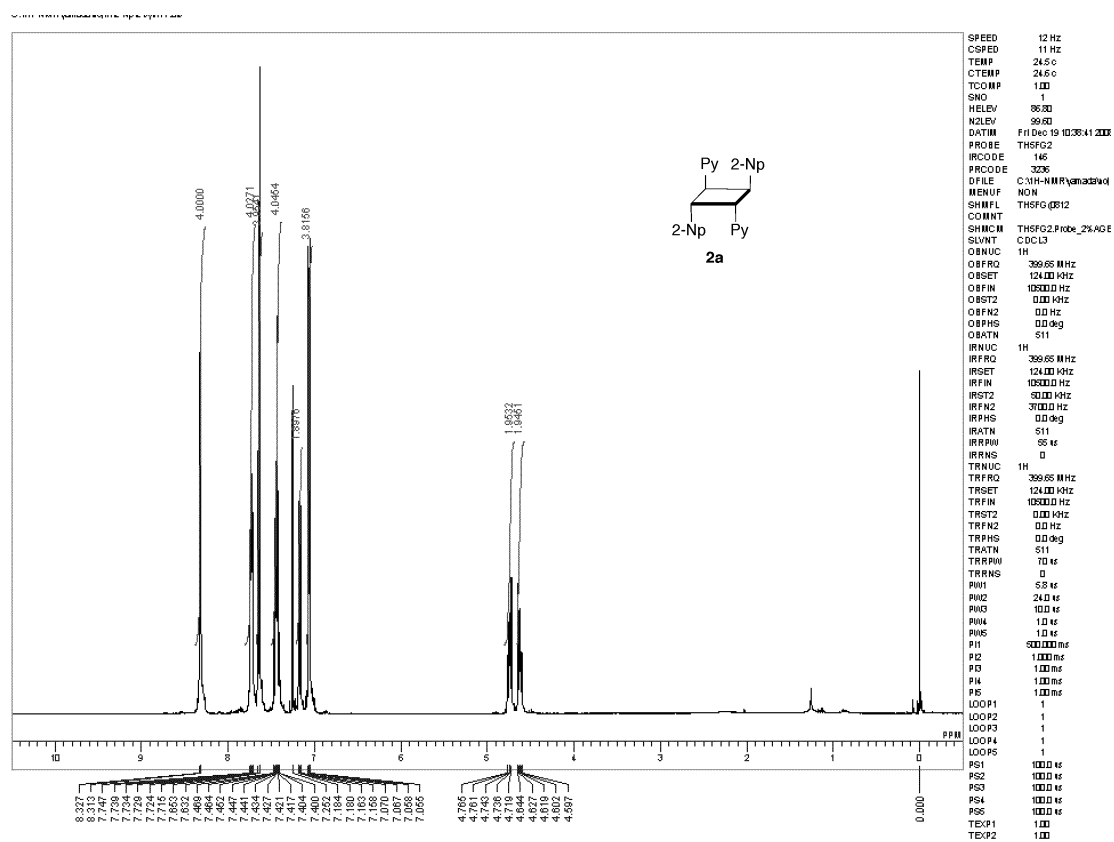

Figure S1. <sup>1</sup>H NMR spectrum for 2a





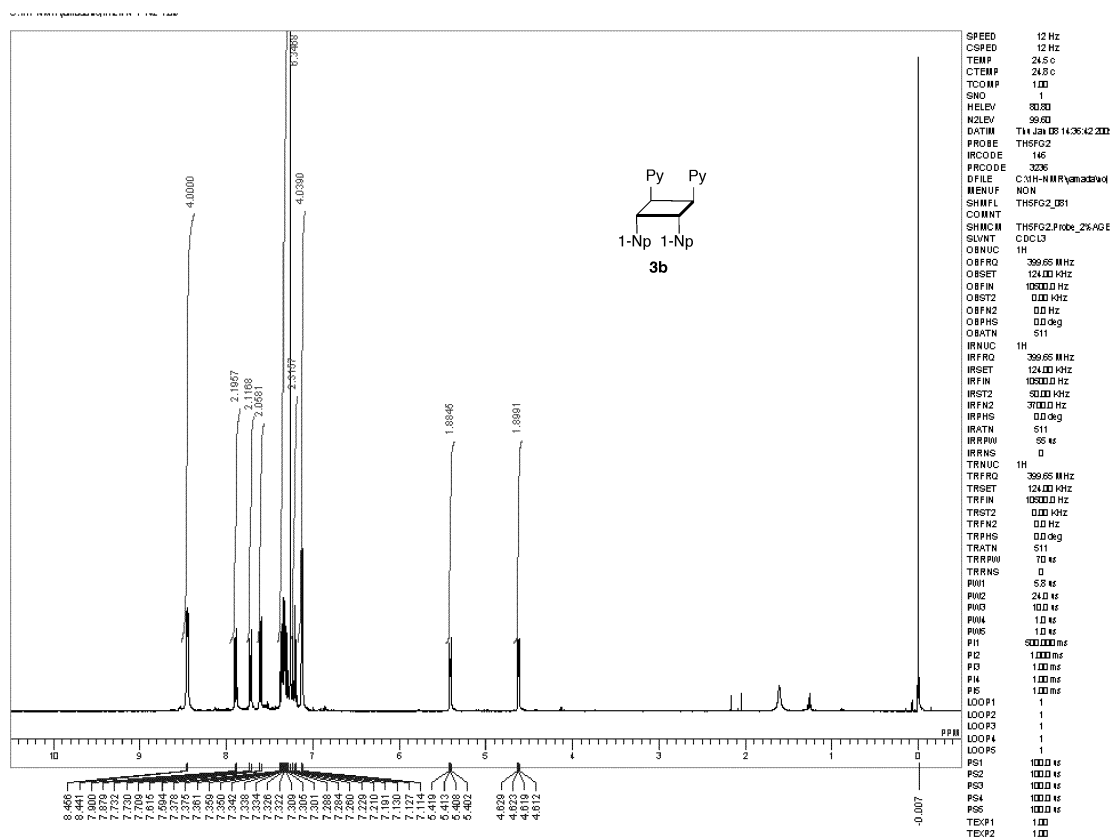

**Figure S4.** <sup>1</sup>H NMR spectrum for **3b**

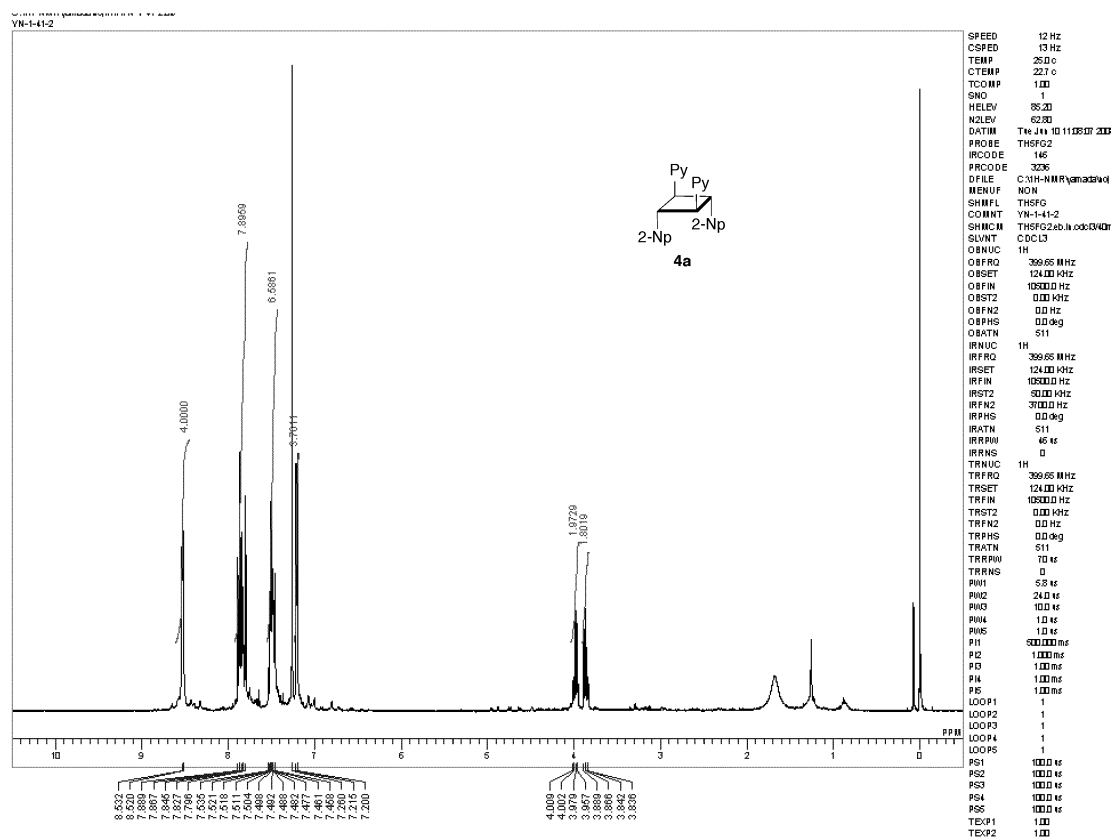

**Figure S5.** <sup>1</sup>H NMR spectrum for **4a**







## 2. MS spectra for 3a, 4b and 5a

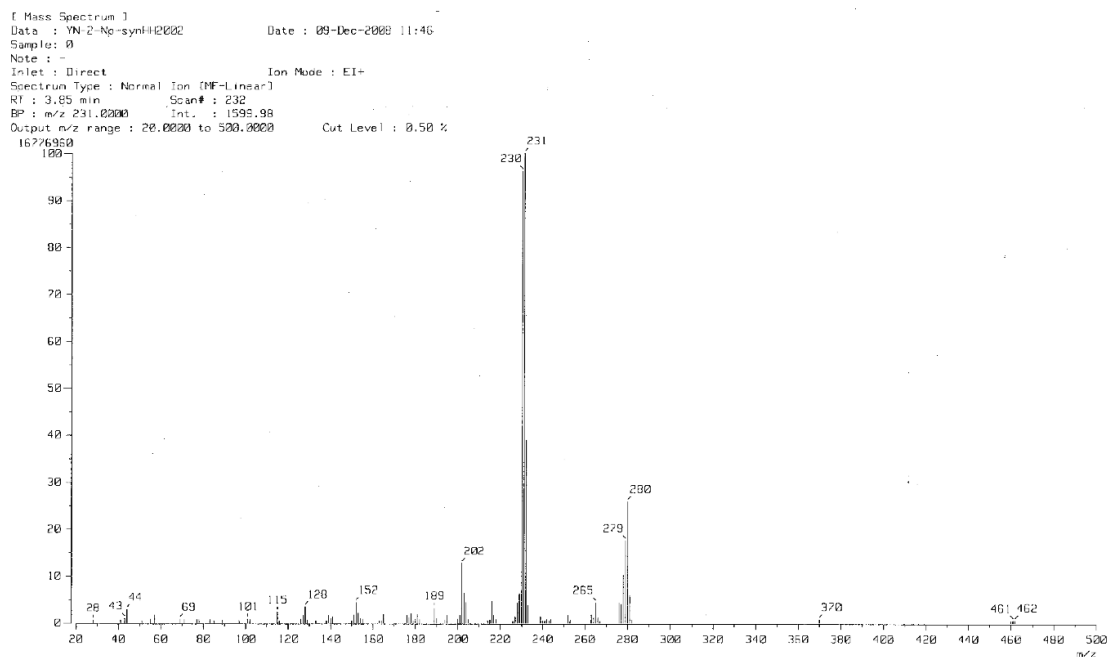

Figure S8. MS spectrum of 3a

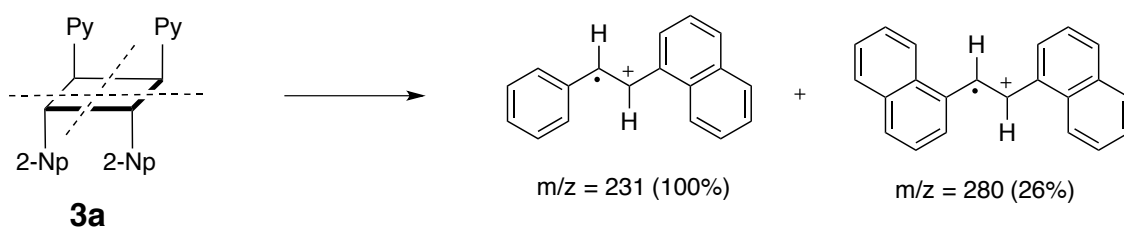

Figure S9. Determination of a head-to-head structure of 3a

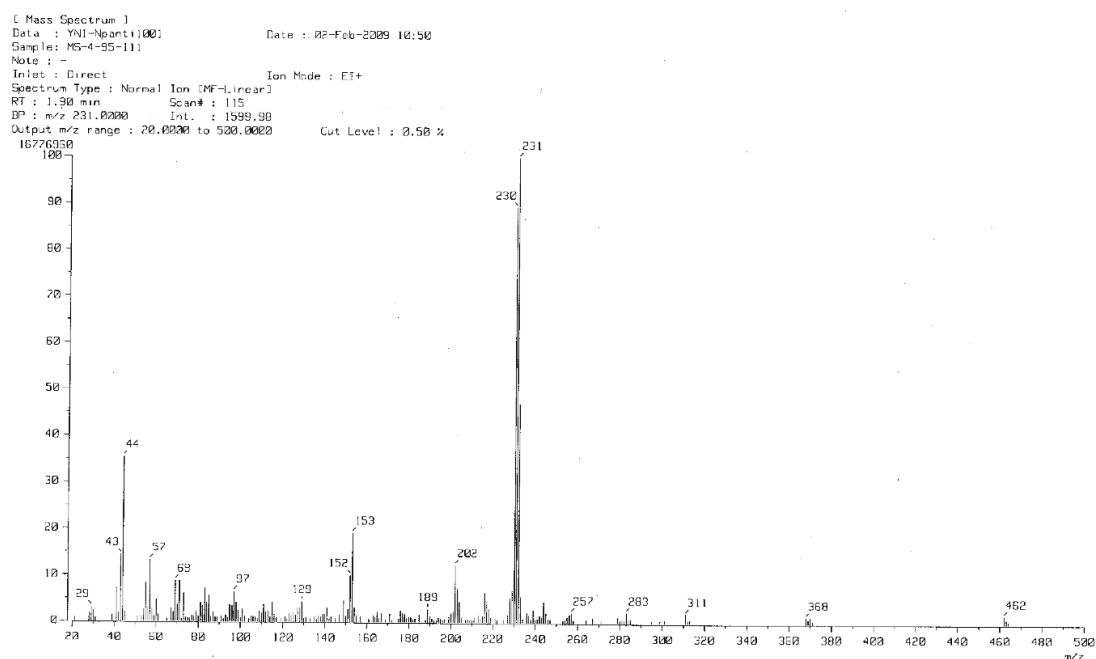

**Figure S10.** MS spectra for **4b**

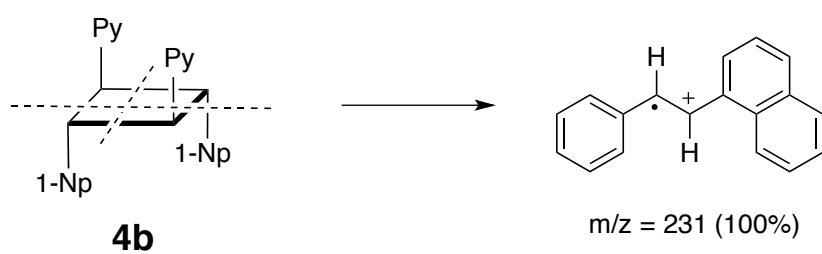

**Figure S11.** Determination of a head-to-tail structure of **4b**

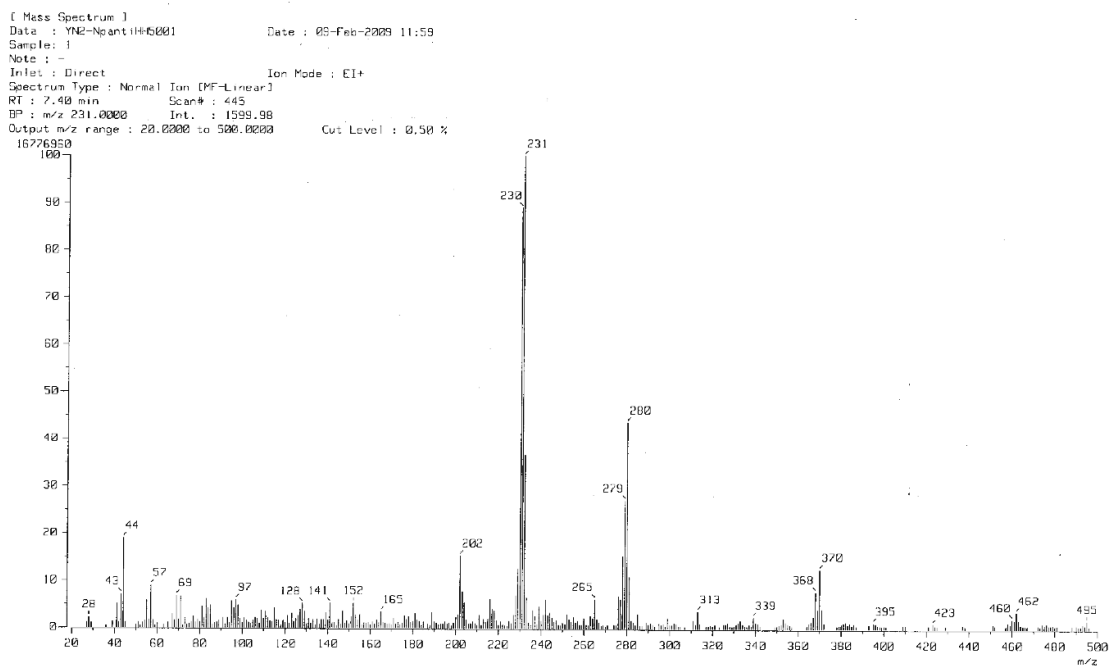

**Figure S12.** MS spectrum of **5a**

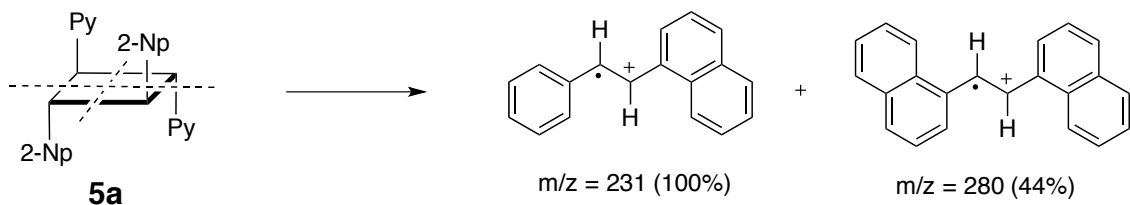

**Figure S13.** Determination of a head-to-head structure of **5a**

### 3. Plot of second-order kinetics for the formation of 2a

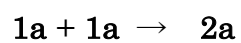

$$d[1a]/dt = -k[1a]^2$$

$$-d[1a]/[1a]^2 = -k dt$$

$$1/[1a] - 1/[1a]_0 = kt$$

$$1/[1a] = kt + 1/[1a]_0 \quad ([1a] = [1a]_0 / (1 + kt[1a]_0))$$

| Time (h) | [1a] (M) | 1/[1a] |
|----------|----------|--------|
| 0        | 1        | 1      |
| 0.25     | 0.59     | 1.7    |
| 0.5      | 0.43     | 2.3    |
| 1        | 0.36     | 2.8    |
| 2        | 0.09     | 11     |
| 5        | 0.05     | 20     |
| 8        | 0.02     | 50     |

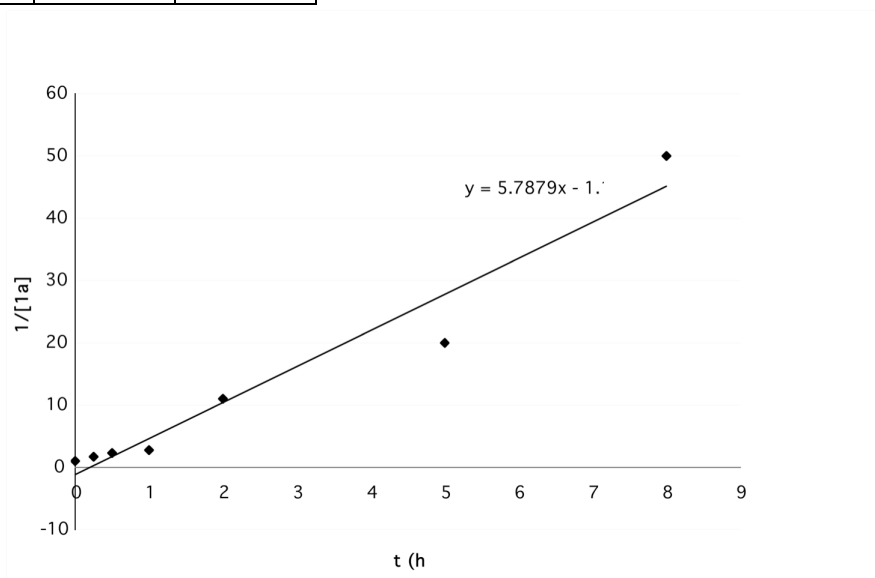

**Figure S14.** Plot of second-order kinetics for the formation of 2a
